# Supplementary material
Source: Springer Nature journal article supplement (https://www.springermedizin.de/resource/supplementary/12884_2010_303_MOESM2_ESM.pdf/9457418)

**8-12 weeks' gestation**  
Weight gain recommendations,  
Physical activity counseling

**16-18 weeks' gestation**  
Booster for physical activity  
Dietary counseling, weight development

**22-24 weeks' gestation**  
Booster for physical activity and dietary  
counseling, weight development

**32-34 weeks' gestation**  
Booster for physical activity and dietary  
counseling, weight development

**36-37 weeks' gestation**  
Booster for physical activity and dietary  
counseling, weight development

**Monthly thematic  
meetings on physical  
activity**

**Meetings finish 37-39  
week's gestation**

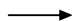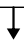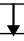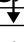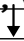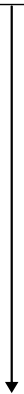

Supplement: MOESM2 [file 9457418]
